# Supplementary material for: UV-A and UV-B excitation region broadened novel green color-emitting CaGd2ZnO5:Tb3+ nanophosphors
Source: Royal Society of Chemistry journal article supplement (doi:10.1039/c4ra15376f), 2015-01-01
Supplement: c4ra15376f1.pdf [file c4ra15376f1.pdf]

## UV-A and UV-B excitation region broadened novel green color-emitting $\text{CaGd}_2\text{ZnO}_5: \text{Tb}^{3+}$ nanophosphors

G. Seeta Rama Raju, E. Pavitra, Goli Nagaraju, Xiang-Yu Guan and Jae Su Yu\*

*Department of Electronics and Radio Engineering, Institute for Laser Engineering, Kyung Hee University, 1 Seocheon-dong, Giheung-gu, Yongin-si, Gyeonggi-do 446-701 Republic of Korea.*

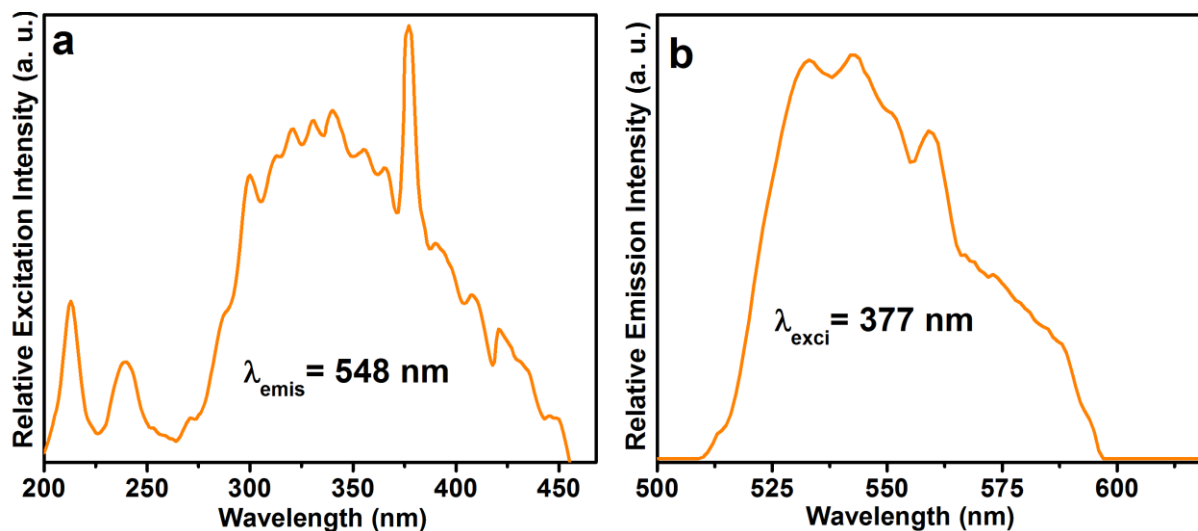

Fig. S1: (a) PLE and (b) PL spectra of CGZO host lattice.

Figure S1. Shows the PLE and PL spectra of CGZO host lattice which exhibited the broad excitation and emission bands due to the surface states and oxygen deficiency related defects.

**CIE chromaticity coordinates calculations:**

The 1931 CIE (x, y) chromaticity coordinates are calculated from the spectral power distribution (SPD) of the light source and the CIE color-matching functions (Figure S2). The numerical values of these color-matching functions are tabulated in Table S1.

The  $\bar{X}$ ,  $\bar{Y}$ ,  $\bar{Z}$  color-matching functions give the tristimulus value X, Y and Z:

$$X = \int p \bar{x} d\lambda, \quad Y = \int p \bar{y} d\lambda, \quad Z = \int p \bar{z} d\lambda,$$

where p is the SPD of the light source. From X, Y and Z, the chromaticity coordinates x, y, z can be obtained as follows:

$$x = \frac{X}{X+Y+Z} \quad y = \frac{Y}{X+Y+Z}$$

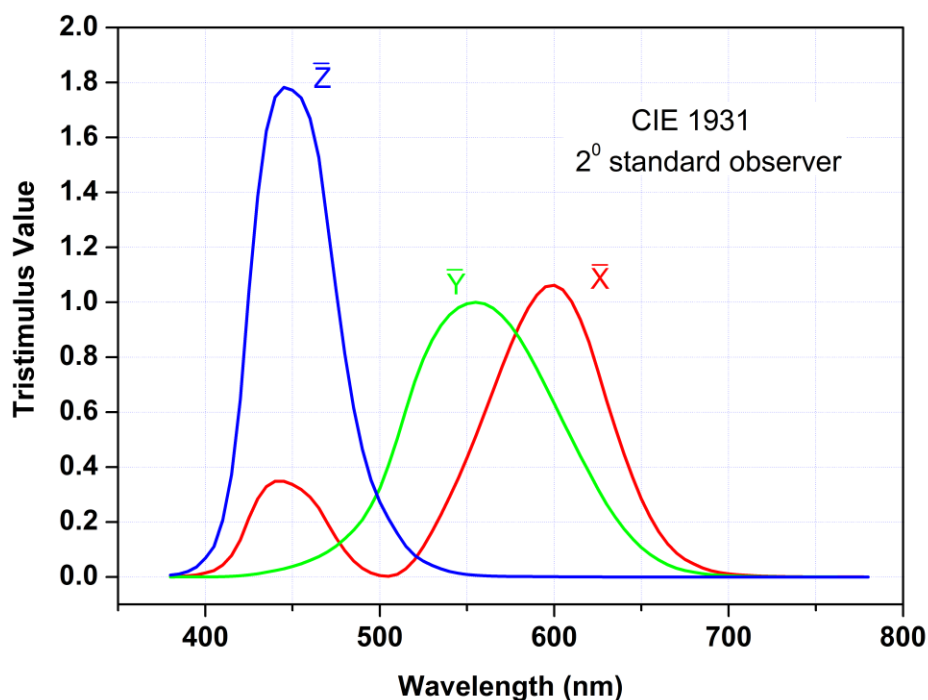

**Fig. S2:** CIE color matching functions

**Table S1:** CIE 1931 two-degree color-matching functions

| $\lambda/\text{nm}$ | Spectral tristimulus values |                    |                    |
|---------------------|-----------------------------|--------------------|--------------------|
|                     | $\bar{x}(\lambda)$          | $\bar{y}(\lambda)$ | $\bar{z}(\lambda)$ |
|                     | red                         | green              | blue               |
| 380                 | 0.0014                      | 0.0000             | 0.0065             |
| 385                 | 0.0022                      | 0.0001             | 0.0105             |
| 390                 | 0.0042                      | 0.0001             | 0.0201             |
| 395                 | 0.0076                      | 0.0002             | 0.0362             |
| 400                 | 0.0143                      | 0.0004             | 0.0679             |
| 405                 | 0.0232                      | 0.0006             | 0.1102             |
| 410                 | 0.0435                      | 0.0012             | 0.2074             |
| 415                 | 0.0776                      | 0.0022             | 0.3713             |
| 420                 | 0.1344                      | 0.0040             | 0.6456             |
| 425                 | 0.2148                      | 0.0073             | 1.0391             |
| 430                 | 0.2839                      | 0.0116             | 1.3856             |
| 435                 | 0.3285                      | 0.0168             | 1.6230             |
| 440                 | 0.3483                      | 0.0230             | 1.7471             |
| 445                 | 0.3481                      | 0.0298             | 1.7826             |
| 450                 | 0.3362                      | 0.0380             | 1.7721             |
| 455                 | 0.3187                      | 0.0480             | 1.7441             |
| 460                 | 0.2908                      | 0.0600             | 1.6692             |
| 465                 | 0.2511                      | 0.0739             | 1.5281             |
| 470                 | 0.1954                      | 0.0910             | 1.2876             |
| 475                 | 0.1421                      | 0.1126             | 1.0419             |

|     |        |        |        |
|-----|--------|--------|--------|
| 480 | 0.0956 | 0.1390 | 0.8130 |
| 485 | 0.0580 | 0.1693 | 0.6162 |
| 490 | 0.0320 | 0.2080 | 0.4652 |
| 495 | 0.0147 | 0.2586 | 0.3533 |
| 500 | 0.0049 | 0.3230 | 0.2720 |
| 505 | 0.0024 | 0.4073 | 0.2123 |
| 510 | 0.0093 | 0.5030 | 0.1582 |
| 515 | 0.0291 | 0.6082 | 0.1117 |
| 520 | 0.0633 | 0.7100 | 0.0782 |
| 525 | 0.1096 | 0.7932 | 0.0573 |
| 530 | 0.1655 | 0.8620 | 0.0422 |
| 535 | 0.2257 | 0.9149 | 0.0298 |
| 540 | 0.2904 | 0.9540 | 0.0203 |
| 545 | 0.3597 | 0.9803 | 0.0134 |
| 550 | 0.4334 | 0.9950 | 0.0087 |
| 555 | 0.5121 | 1.0000 | 0.0057 |
| 560 | 0.5945 | 0.9950 | 0.0039 |
| 565 | 0.6784 | 0.9786 | 0.0027 |
| 570 | 0.7621 | 0.9520 | 0.0021 |
| 575 | 0.8425 | 0.9154 | 0.0018 |
| 580 | 0.9163 | 0.8700 | 0.0017 |
| 585 | 0.9786 | 0.8163 | 0.0014 |
| 590 | 1.0263 | 0.7570 | 0.0011 |
| 595 | 1.0567 | 0.6949 | 0.0010 |
| 600 | 1.0622 | 0.6310 | 0.0008 |
| 605 | 1.0456 | 0.5668 | 0.0006 |
| 610 | 1.0026 | 0.5030 | 0.0003 |
| 615 | 0.9384 | 0.4412 | 0.0002 |

|     |        |        |        |
|-----|--------|--------|--------|
| 620 | 0.8544 | 0.3810 | 0.0002 |
| 625 | 0.7514 | 0.3210 | 0.0001 |
| 630 | 0.6424 | 0.2650 | 0.0000 |
| 635 | 0.5419 | 0.2170 | 0.0000 |
| 640 | 0.4479 | 0.1750 | 0.0000 |
| 645 | 0.3608 | 0.1382 | 0.0000 |
| 650 | 0.2835 | 0.1070 | 0.0000 |
| 655 | 0.2187 | 0.0816 | 0.0000 |
| 660 | 0.1649 | 0.0610 | 0.0000 |
| 665 | 0.1212 | 0.0446 | 0.0000 |
| 670 | 0.0874 | 0.0320 | 0.0000 |
| 675 | 0.0636 | 0.0232 | 0.0000 |
| 680 | 0.0468 | 0.0170 | 0.0000 |
| 685 | 0.0329 | 0.0119 | 0.0000 |
| 690 | 0.0227 | 0.0082 | 0.0000 |
| 695 | 0.0158 | 0.0057 | 0.0000 |
| 700 | 0.0114 | 0.0041 | 0.0000 |
| 705 | 0.0081 | 0.0029 | 0.0000 |
| 750 | 0.0003 | 0.0001 | 0.0000 |
| 755 | 0.0002 | 0.0001 | 0.0000 |
| 760 | 0.0002 | 0.0001 | 0.0000 |
| 765 | 0.0001 | 0.0000 | 0.0000 |
| 770 | 0.0001 | 0.0000 | 0.0000 |
| 775 | 0.0001 | 0.0000 | 0.0000 |
| 780 | 0.0000 | 0.0000 | 0.0000 |
